# Supplementary material for: Bioconcentration of organic dyes via fungal hyphae and their derived carbon fibers for supercapacitors
Source: Royal Society of Chemistry journal article supplement (doi:10.1039/c8ta02655f), 2018-01-01
Supplement: c8ta02655f1.pdf [file c8ta02655f1.pdf]

## Supporting Information

# Bioconcentration of organic dyes via fungal hyphae and their derived carbon fibers for supercapacitors

Jia Lei <sup>a,b</sup>, Qi Guo <sup>b</sup>, Weitang Yao <sup>b</sup>, Tao Duan <sup>a,b</sup>, Ping Chen <sup>c,\*</sup> and Wenkun Zhu <sup>a,b,\*</sup>

*a. Sichuan Civil-military Integration Institute, Southwest University of Science and Technology, Mianyang, Sichuan, 621010, P. R. China.*

*b. Sichuan New Energy Materials Civil-military Integration Innovation Center, Southwest University of Science and Technology, Mianyang, Sichuan, 621010, P. R. China*

*c. School of Chemistry and Chemical Engineering, Anhui University, Hefei, Anhui, P. R. China.*

\*corresponding author: [zhuwenkun@swust.edu.cn](mailto:zhuwenkun@swust.edu.cn), [chenping@ahu.edu.cn](mailto:chenping@ahu.edu.cn).

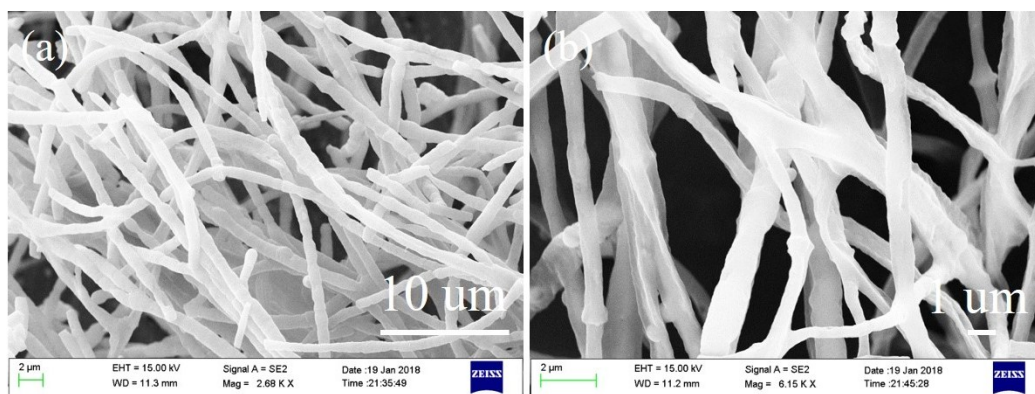

**Fig. S1.** SEM images of FHCF.

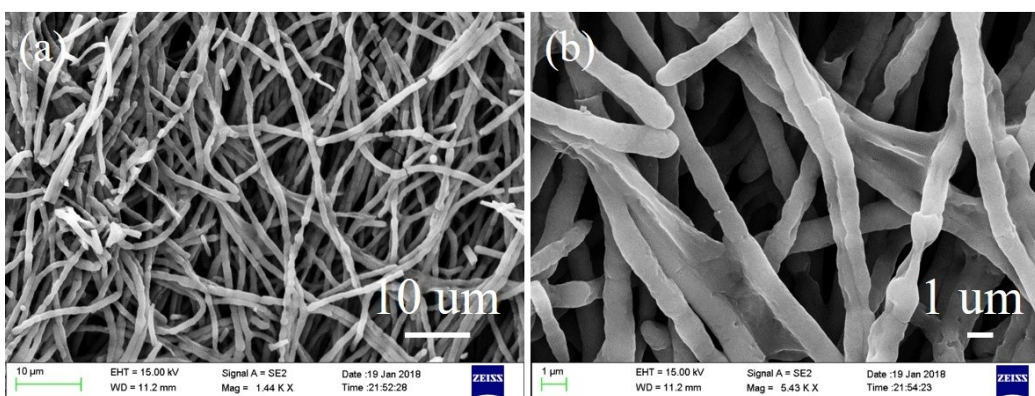

**Fig. S2.** SEM images of N-FHCF (MV).

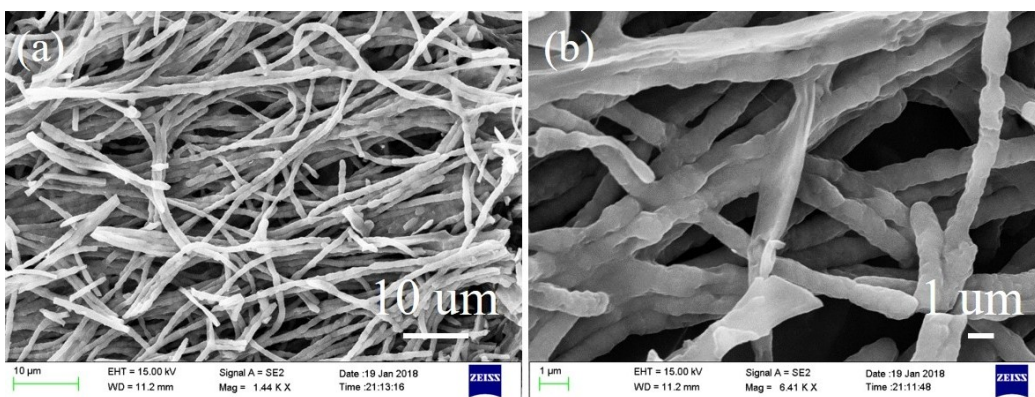

**Fig. S3.** SEM images of N-S-FHCF (CR).

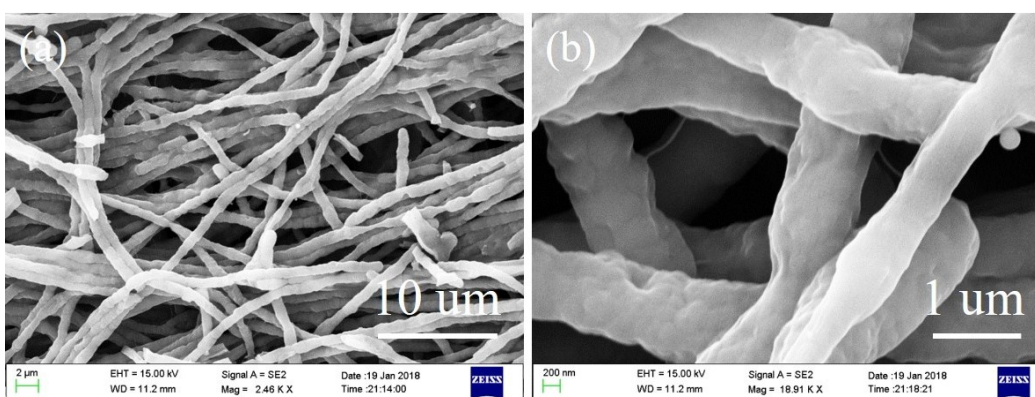

**Fig. S4.** SEM images of N-S-FHCF (AF).

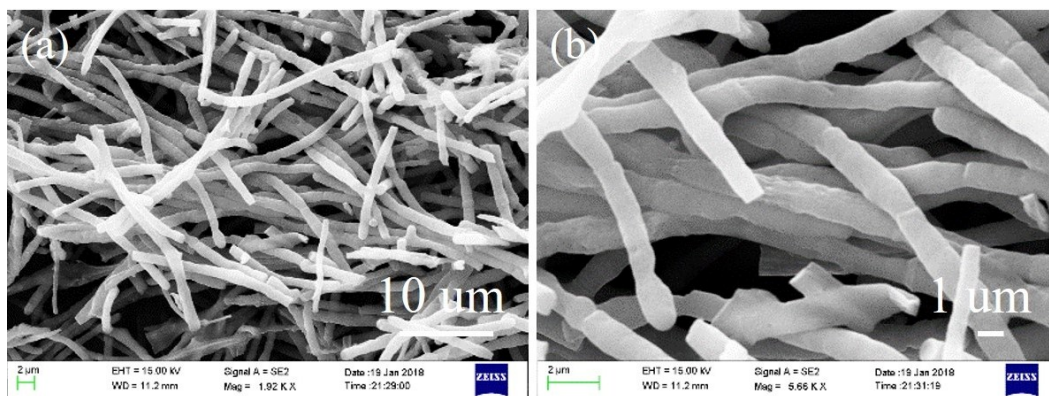

**Fig. S5.** SEM images of N-FHCF (RB).

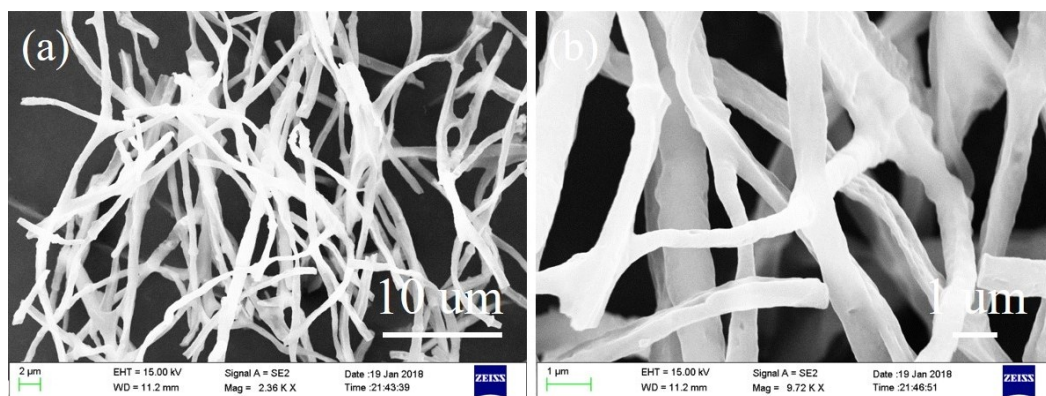

**Fig. S6.** SEM images of N-S-FHCF (MO).

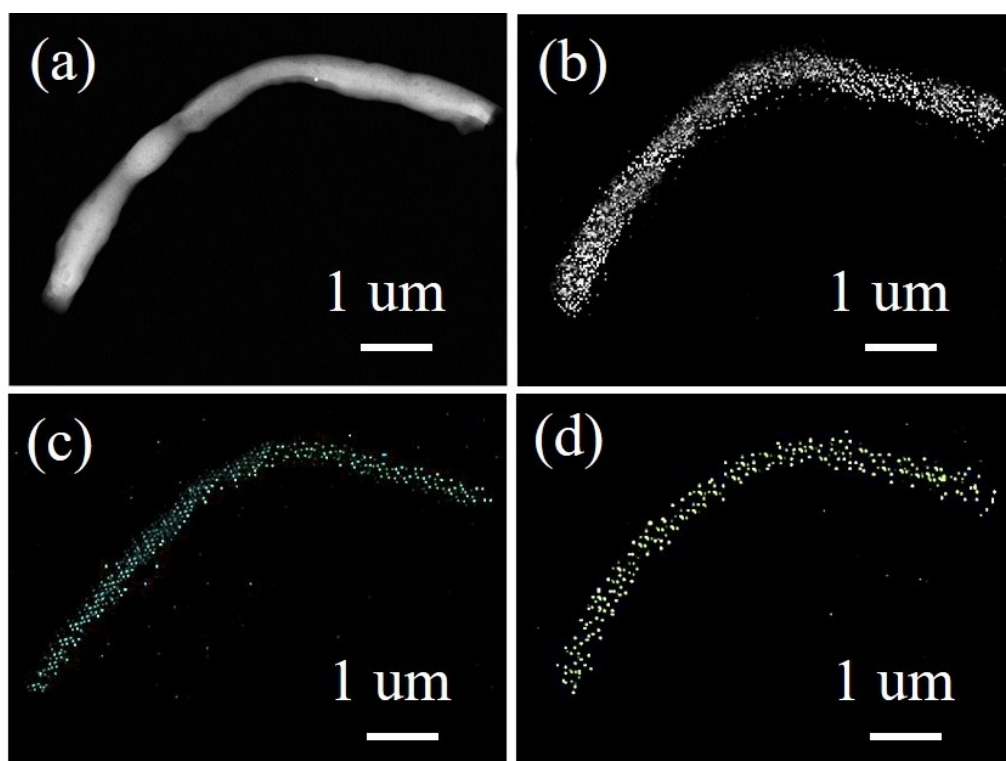

**Fig. S7.** (a) Typical EFTEM image and corresponding elemental mapping images of (b) C, (c) N, and (d) O.

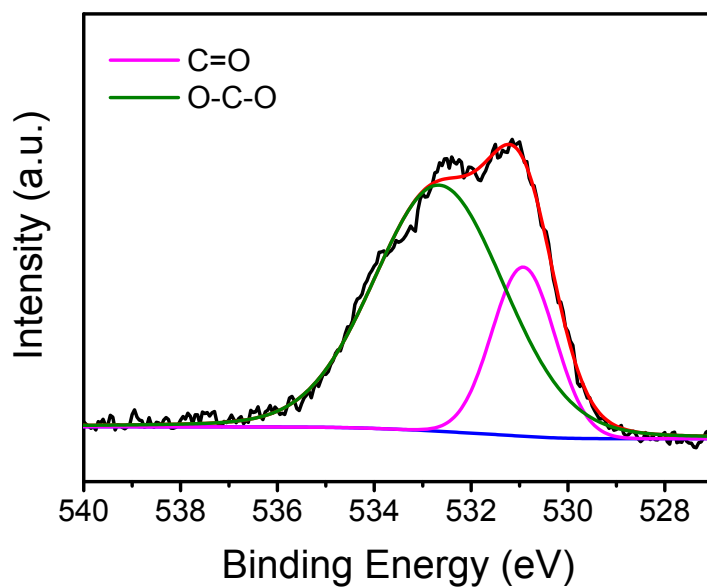

**Fig. S8.** The high-resolution spectra in O1s region for N-S-FHCF (MB).



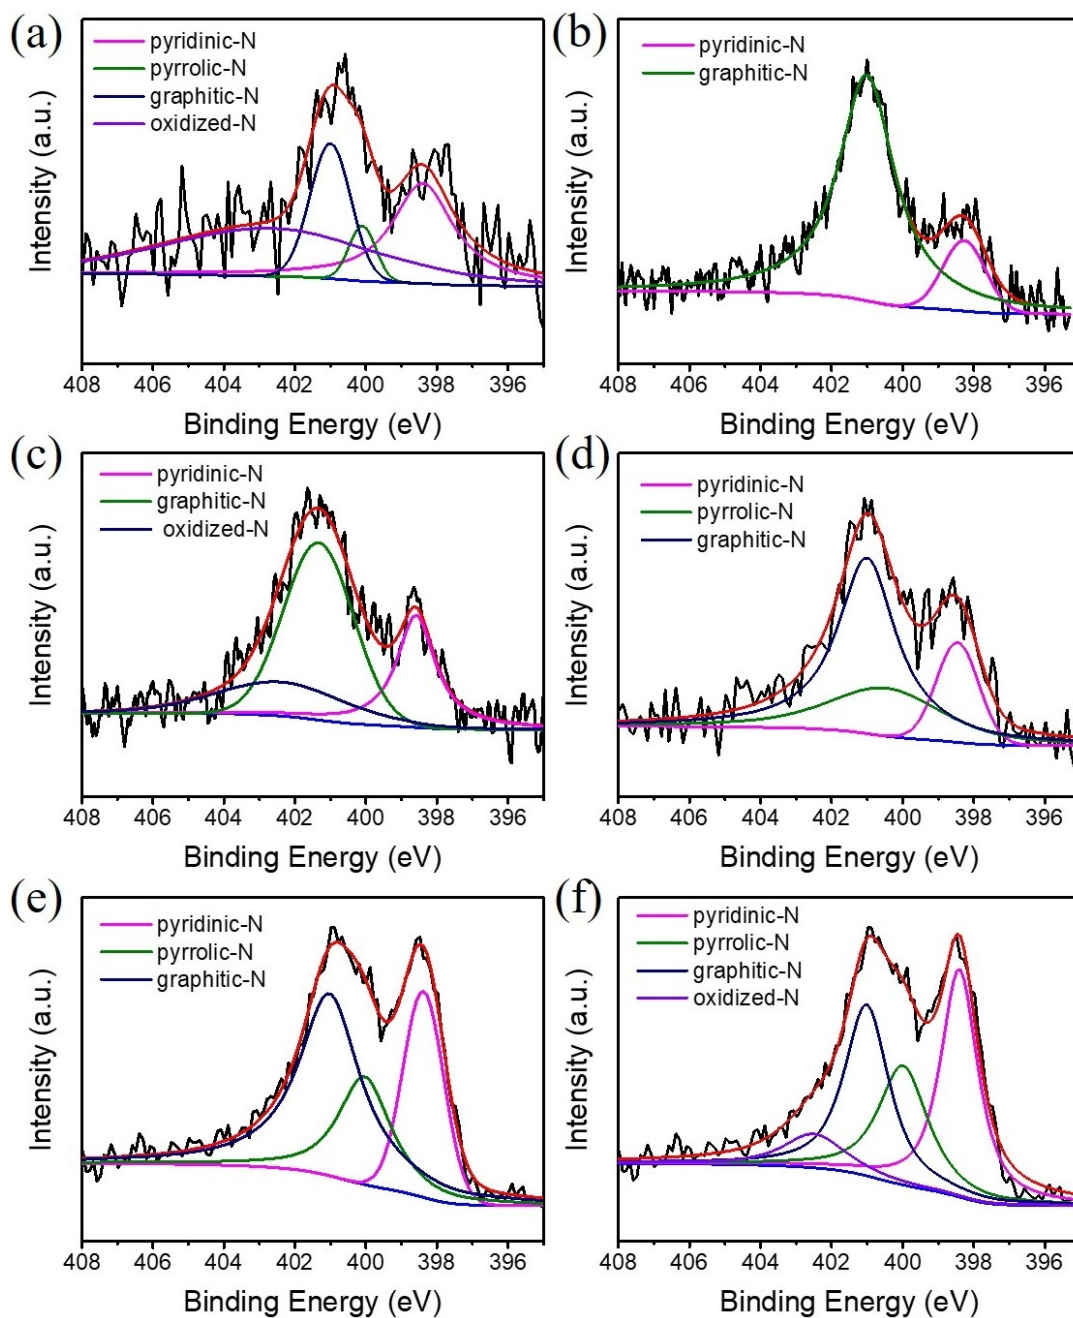

**Fig. S9.** The high-resolution spectra in N1s region for (a) FHCF, (b) N-FHCF (MV), (c) N-S-FHCF (CR), (d) N-S-FHCF (AF), (e) N-FHCF (RB), (f) N-S-FHCF (MO)

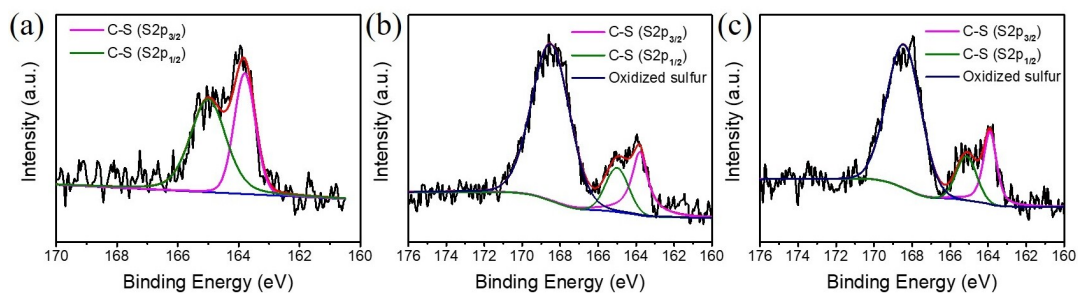

**Fig. S10.** The high-resolution spectra in S2p region for (a) N-S-FHCF (CR), (b) N-S-FHCF (AF), (c) N-S-FHCF (MO).

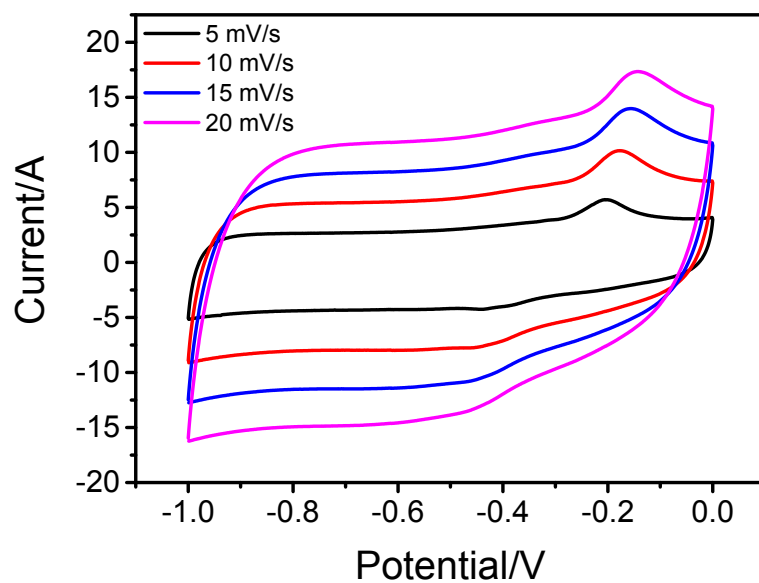

**Fig. S11.** CV curves of N-S-FHCF (MO) at different scan rates.

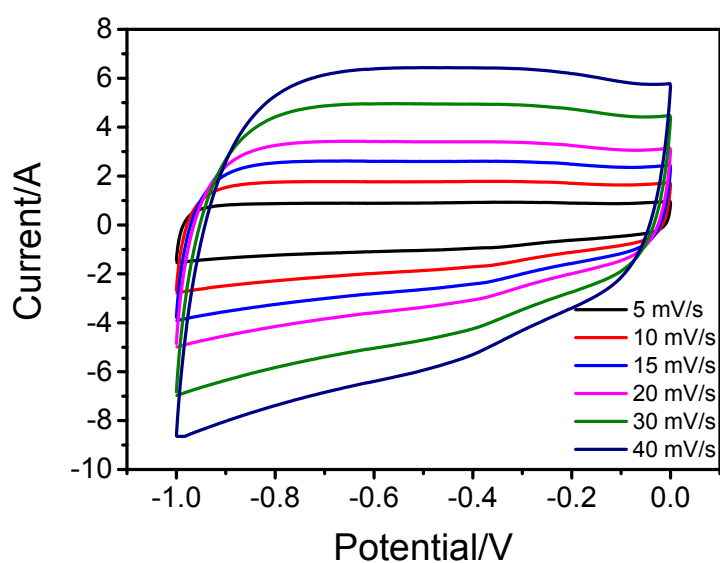

**Fig. S12.** CV curves of N-S-FHCF (CR) at different scan rates.

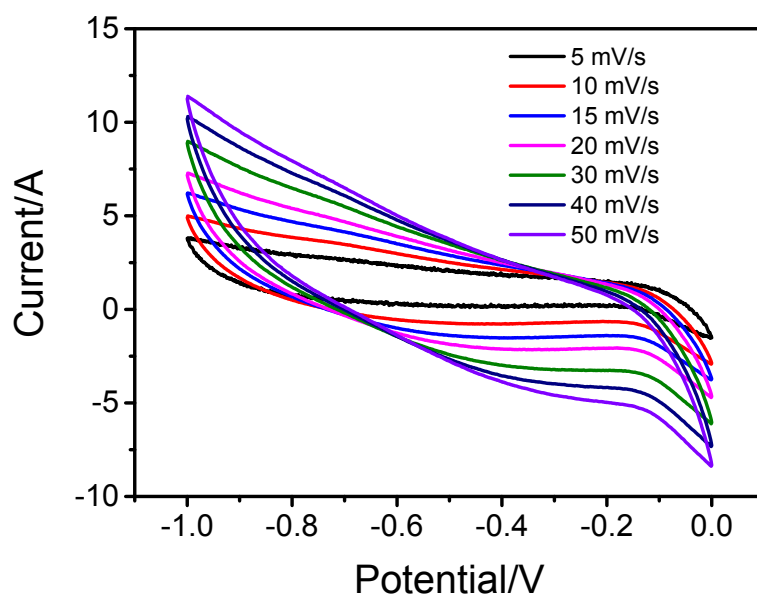

**Fig. S13.** CV curves of N-S-FHCF (AF) at different scan rates.

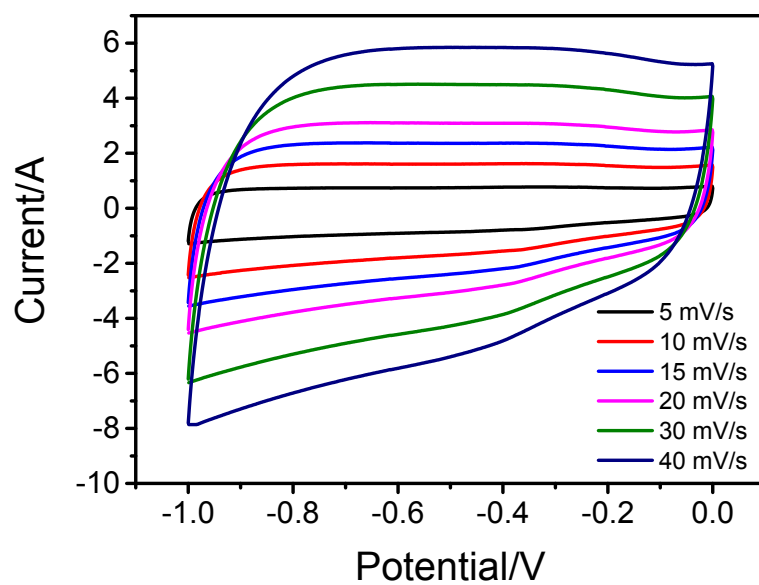

**Fig. S14.** CV curves of N-S-FHCF (MV) at different scan rates.

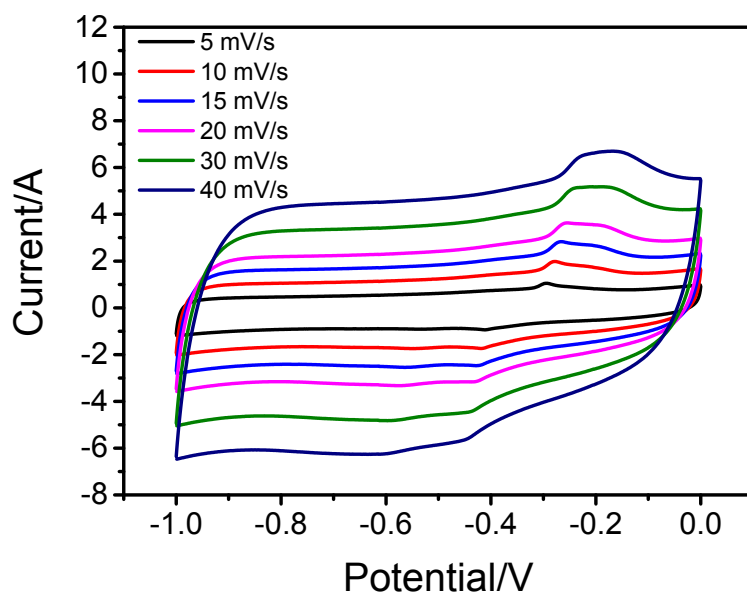

Fig. S15. CV curves of N-S-FHCF (RB) at different scan rates.

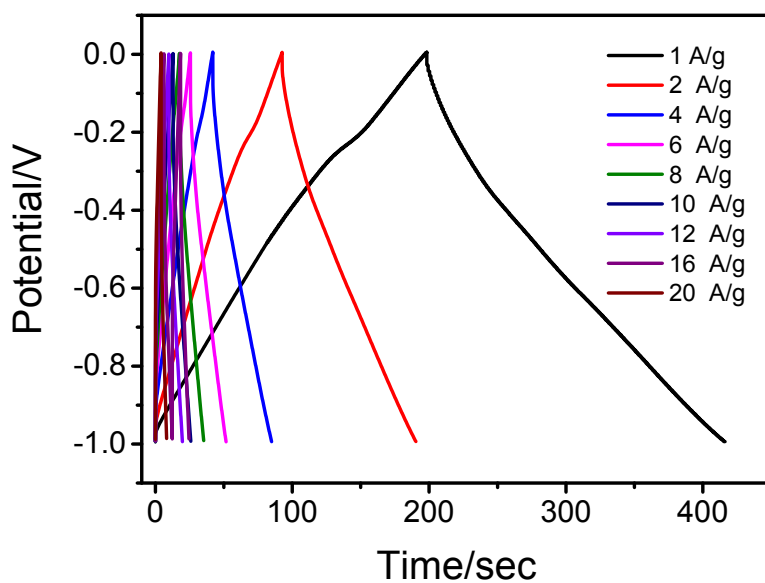

Table S16. GCD profiles of N-S-FHCF (MO) at various current densities.



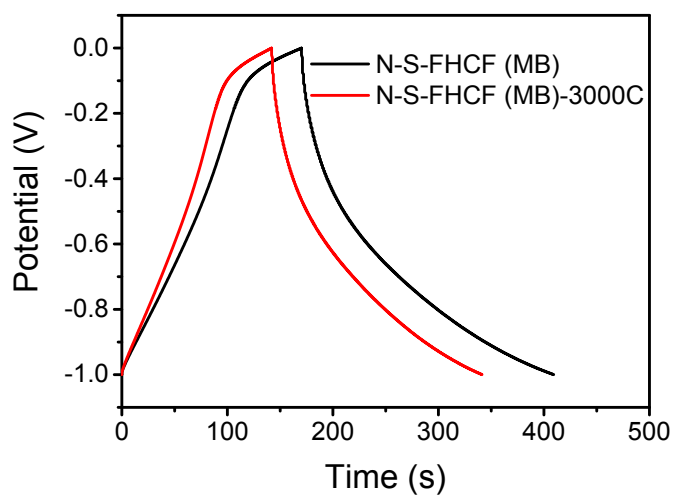

**Table S17.** 1st and 3000st GCD profiles of N-S-FHCF (MB) at 1 A/g.

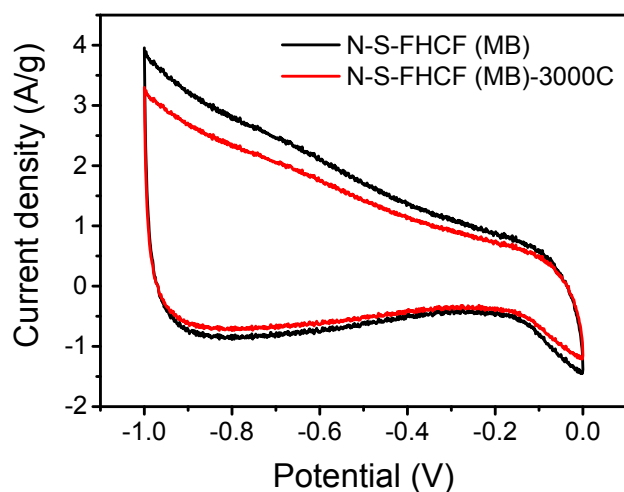

**Table S18.** 1st and 3000st CV curves of N-S-FHCF (MB) at scan rate of 5 mV/s.

**Table S1.** EIS fitting results of FHCF and N-S-FHCF (MB) electrodes.

|               | $R_s$         | $R_{ct}$      |
|---------------|---------------|---------------|
| FHCF          | 0.75 $\Omega$ | 3.59 $\Omega$ |
| N-S-FHCF (MB) | 0.34 $\Omega$ | 1.13 $\Omega$ |
